# Supplementary material for: High-throughput functional screen identifies YWHAZ as a key regulator of pancreatic cancer metastasis
Source: PubMed Central journal article supplement (PMC10349114; doi:10.1038/s41419-023-05951-5), 2023-07-14
Supplement: 41419_2023_5951_MOESM1_ESM.pdf [file 41419_2023_5951_MOESM1_ESM.pdf]

**Supplementary Fig S1. Construction of a well-controlled Tet-off system in Pan02 cell line.**

**A.** The activity of the luciferase reporter was regulated by Dox treatment in Pan02-4B3 subclone infected with the pUHC-TRE-luciferase vector containing a modified tetracycline regulated element (TRE). Results are mean  $\pm$  SEM (n=3; \*\* $p$ <0.01). **B.** pLV-TRE-EGFP vector contained a modified TRE element and a GFP reporter. **C.** GFP expression significantly decreased by Dox treatment in Pan02-4B3 infected with pLV-TRE-GFP, but not the parental Pan02 cells. Scale bar, 100  $\mu$ m. **D.** Immunochemical analysis to show GFP expression was significantly reduced in the tumor samples derived from the orthotopic mouse models transplanted with Pan02-4B3-GFP when treated with Dox (2mg/ml, 1% sucrose in drinking water, n=5). White scale bar, 500  $\mu$ m; Black scale bar, 200  $\mu$ m.

**Supplementary Fig S2. The number of metastatic nodules decreased after Dox treatment *in vivo*.**

**A.** For functional validation, the subclones cultured from the first-round screening were separately mixed and re-injected into mice the same way as they were obtained. Gross organs from both groups (-Dox/+Dox) were shown. Left, i.p. (n=10). Right, s.c. (n=10). The arrow indicated metastatic nodules. **B.** The distribution of subclones cultured from metastatic nodules in different mouse models with or without Dox treatment. Although there were no visible metastatic lesions in some mouse models from the +Dox group, G418 resistant subclones could still be cultured. (\* $p$ <0.05).

**Supplementary Fig S3. Validation of PB-GSV targeted *Anxa3* and *Ywhaz* through genomic PCR.**

**A.** The technical principles are illustrated. Primers were designed for specific genes identified with Splinkerette PCR, each of which had a primer targeting either 3'TR or 5'TR on PB-GSV, and the other one was designed within the targeted genes. Products from the other allele could serve as a positive control. **B.** GSV-*Anxa3* integrations were confirmed both in 3'TR and 5'TR of PB-GSV. Results from multiple clones were shown. **C.** GSV-*Ywhaz* integrations were confirmed both in 3'TR and 5'TR of PB-GSV. Each column represents an individual metastatic subclone in B and C. M indicates DNA marker. **D.** *Ywhaz* was identified by Splinkerette PCR from the metastatic lesions. Target band from Splinkerette PCR were extracted and sequenced.

**Supplementary Fig S4. GSV-*Ywhaz* integration doesn't affect the proliferation rate of subcutaneous tumors**

Hematoxylin-eosin staining and immunohistochemical staining images of the subcutaneous tumors from mouse models injected with GSV-*Ywhaz* clone. No significant difference was found for the immunohistochemical staining of Ki67.

**Supplementary Fig S5. Upregulation of YWHAZ expression in GSV-*Ywhaz* clones and derived subcutaneous tumors.**

**A.** GSV-*Ywhaz* mediated YWHAZ upregulation in Pan02. GSV-*Ywhaz* clone was thin spindle shaped, while Pan02-4B3 was polygonal epithelioid. White scale bar, 10  $\mu$ m; Blue scale bar, 5  $\mu$ m. **B.** GSV-*Ywhaz* mediated YWHAZ upregulation in subcutaneous tumors.

**Supplementary Fig S6. YWHAZ overexpression was associated with poor survival in Pan02**

**orthotopic mouse model.**

**A.** Kaplan–Meier survival analysis showed that YWHAZ overexpression significantly shortened the overall survival time in Pan02 orthotopic mouse model. ( $n=8$ ,  $p=0.015$ ). **B.** Representative images of the pancreatic primary tumors, tumor foci in livers or kidneys were also shown.

**Supplementary Fig S7. YWHAZ overexpression significantly increases the number of micro-metastatic lung lesions in AsPC-1 orthotopic mouse models.**

**A, B.** Representative images of the metastatic lesions from orthotopic mouse models. The lesions less than 1mm in diameter was defined as micro-metastasis. **C, D.** Micro-metastasis was measured and confirmed at higher magnification.

**Supplementary Fig S8. The morphological changes in YWHAZ overexpressed Panc1 cells.**

**A.** Western blotting analysis confirmed the overexpression of YWHAZ in Panc1 cells. **B.** Panc1 YW-WT cells were polygonal epithelioid, and Panc1 YW-OV cells showed spindle shape. Scale bar, 10  $\mu\text{m}$ .

**Supplementary Fig S9. Gene set enrichment analysis and Gene Ontology functional annotation of trait-related genes.**

**A.** Gene Set Enrichment Analysis (GSEA) according to YWHAZ expression level in Pan02 cells. **B.** Top enriched GO terms in upregulated genes identified by RNA-seq in Pan02 control cells (Yw-WT) and YWHAZ overexpression cells (Yw-OV).

**Supplementary Fig S10.** Hematoxylin-eosin staining and immunohistochemical staining of the EMT biomarkers and transcription factors in lung metastatic tumors. YWHAZ, N-Cadherin and ZEB1 showed high expression in YWHAZ overexpressed group and low expression in the control Pan02-4B3 ( $n=3$ ,  $p<0.05$ ). E-Cadherin and ZO-1 mainly showed location differences from the membrane into the cytoplasm when YWHAZ overexpressed. E-cadherin also showed changes in the intensity of the staining, from moderate to weak positivity ( $n=3$ ,  $p<0.05$ ).

**Figure S1**

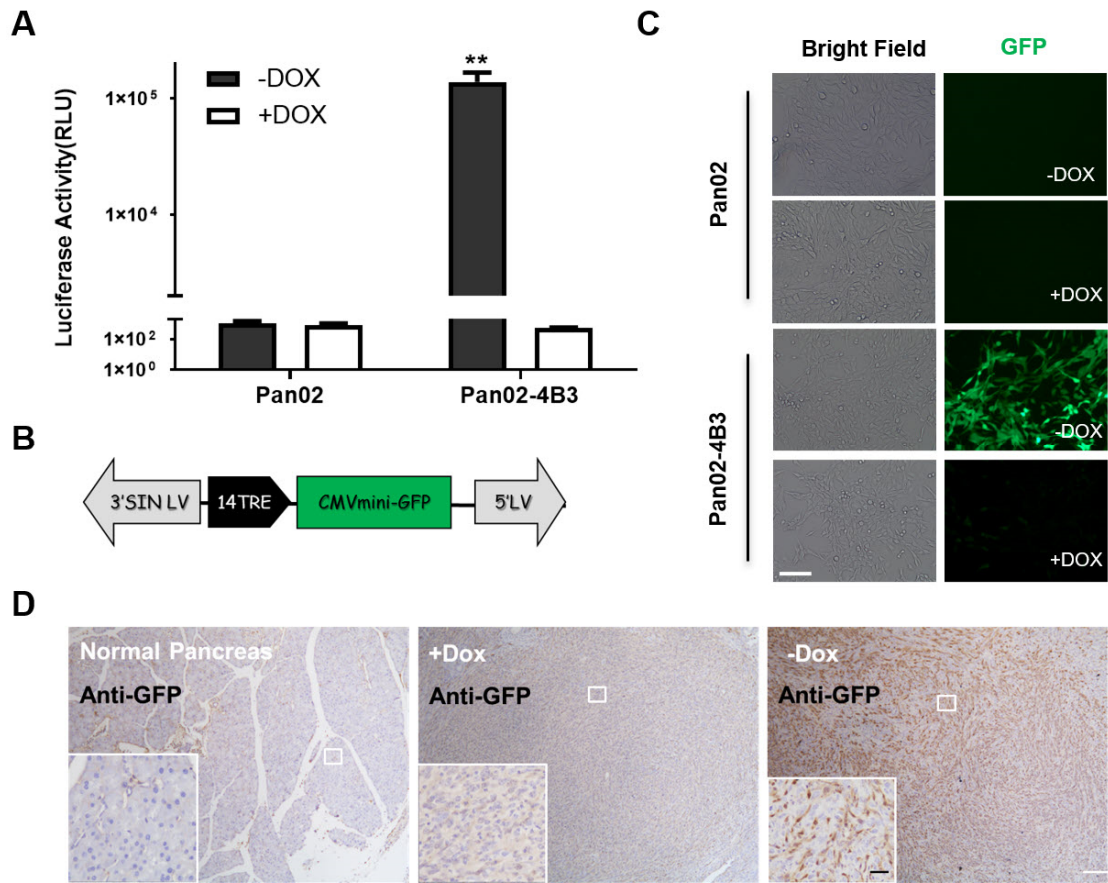

**Figure S2**

**A**

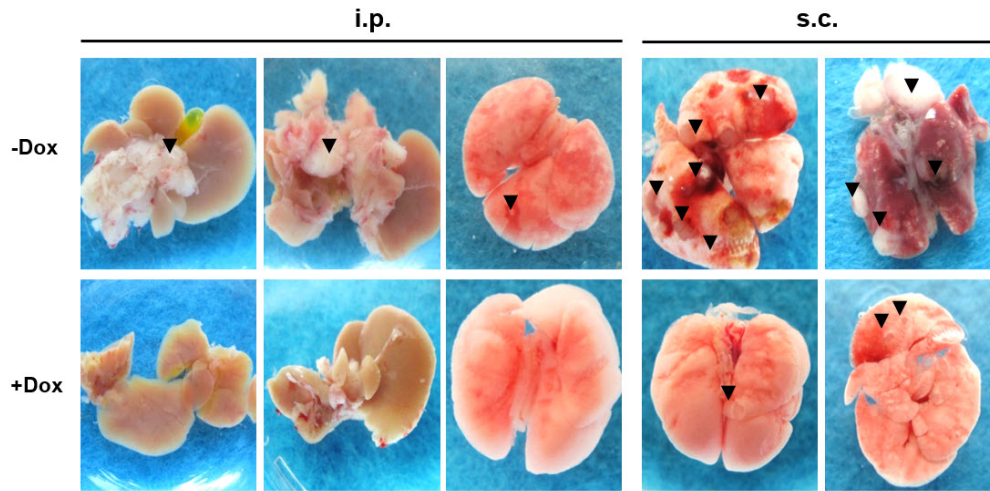

**B**

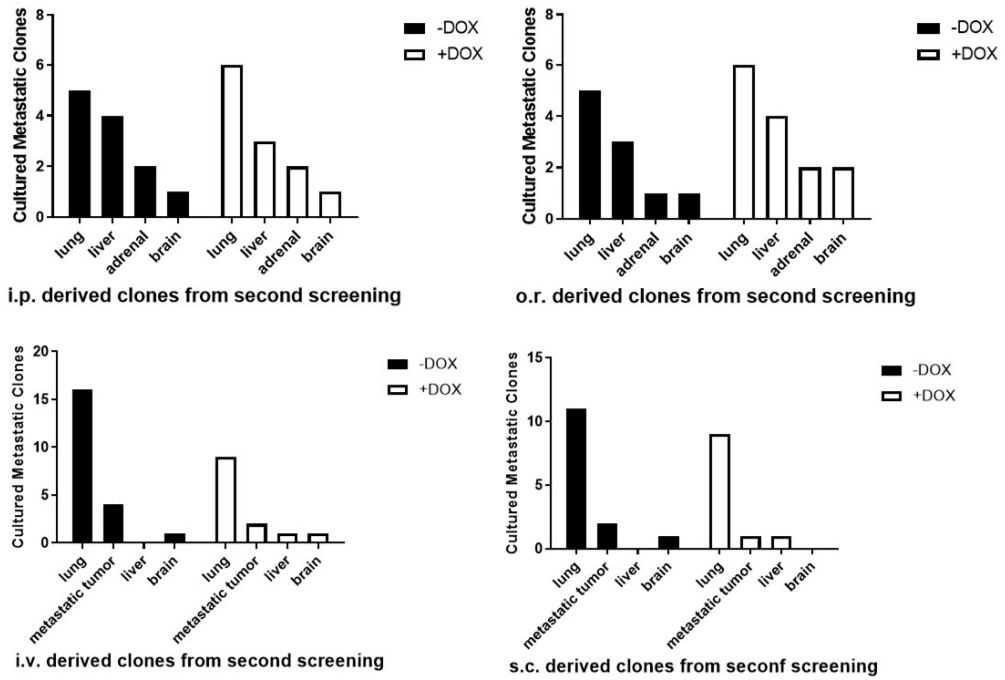

# Figure S3

**A**

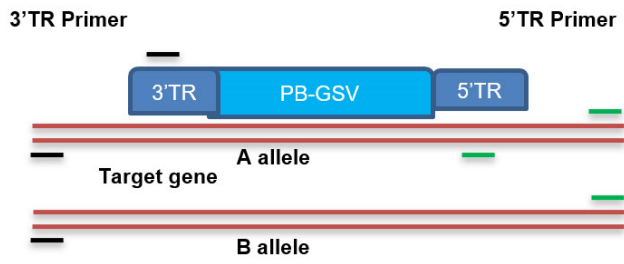

**B**

Validation of GSV-*Anxa3* integrations through PCR in individual metastatic subclones

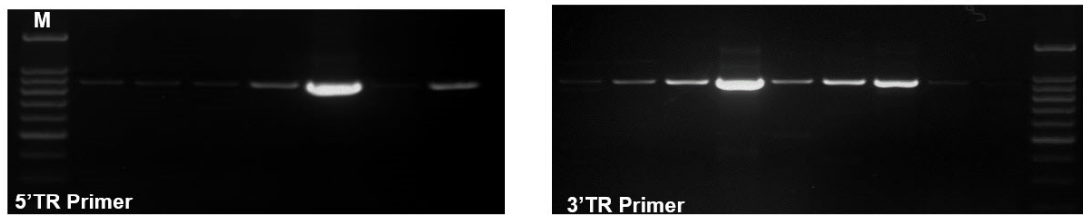

**C**

Validation of GSV-*Ywhaz* integrations through PCR in individual metastatic subclones

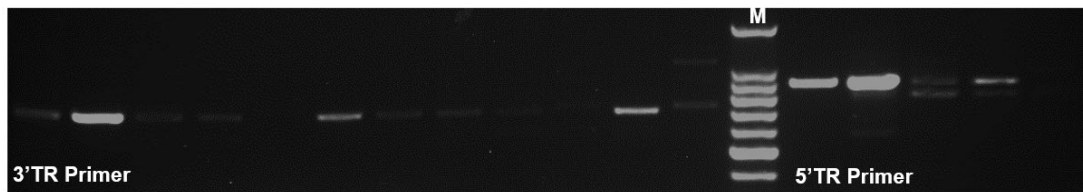

**D**

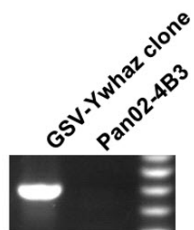

**Figure S4**

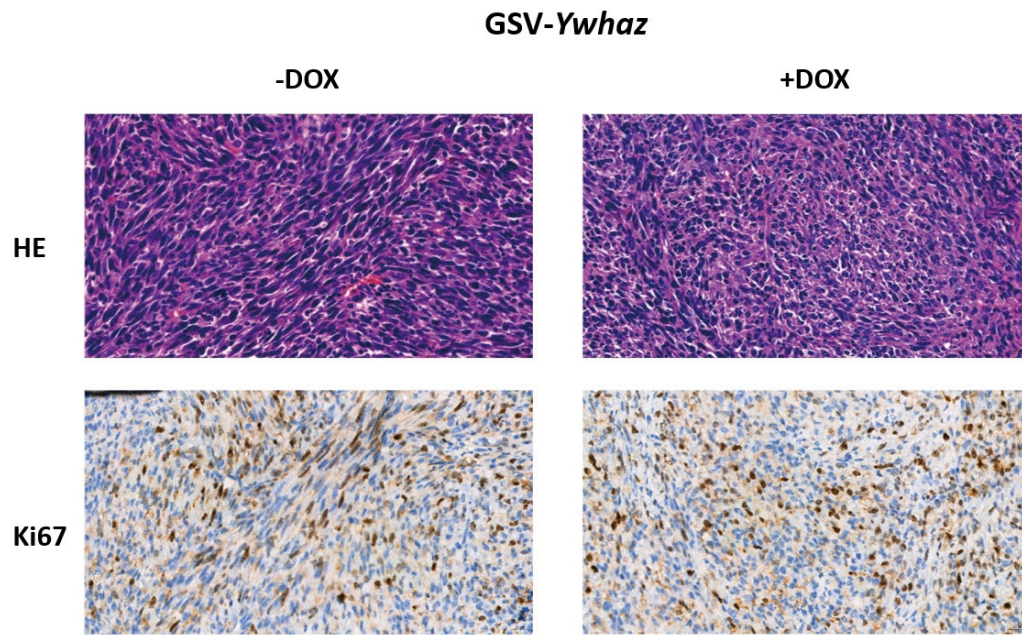

**Figure S5**

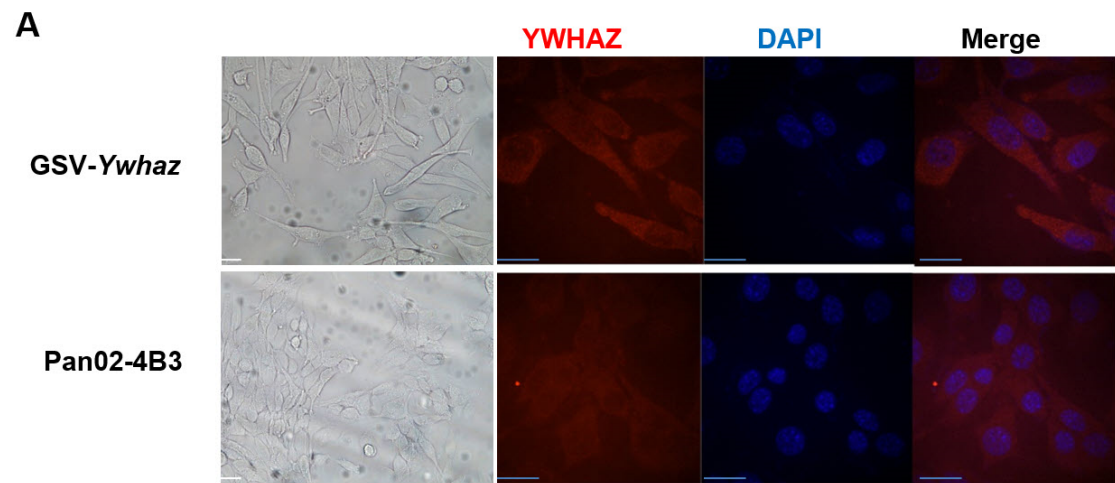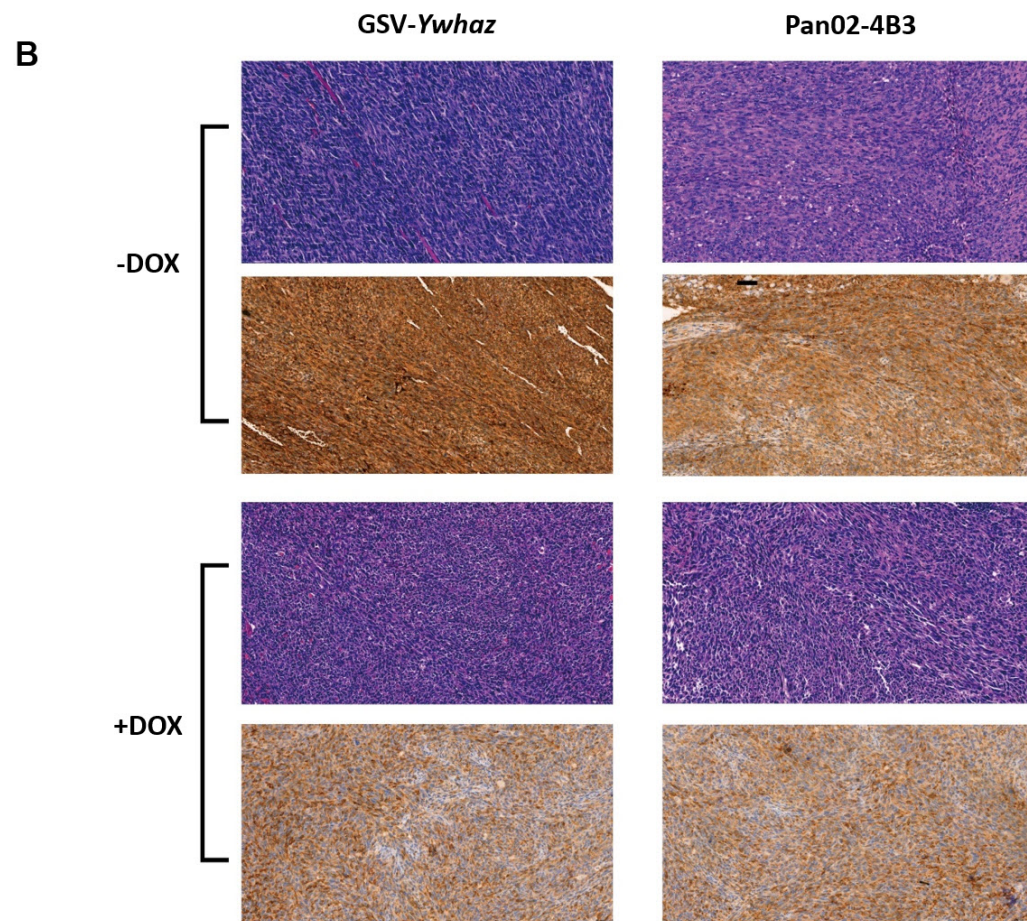

**Figure S6**

**A**

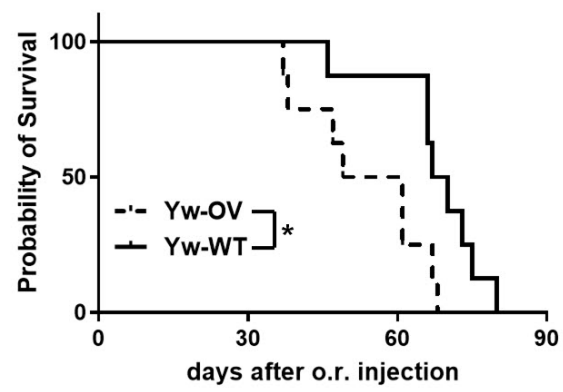

**B**

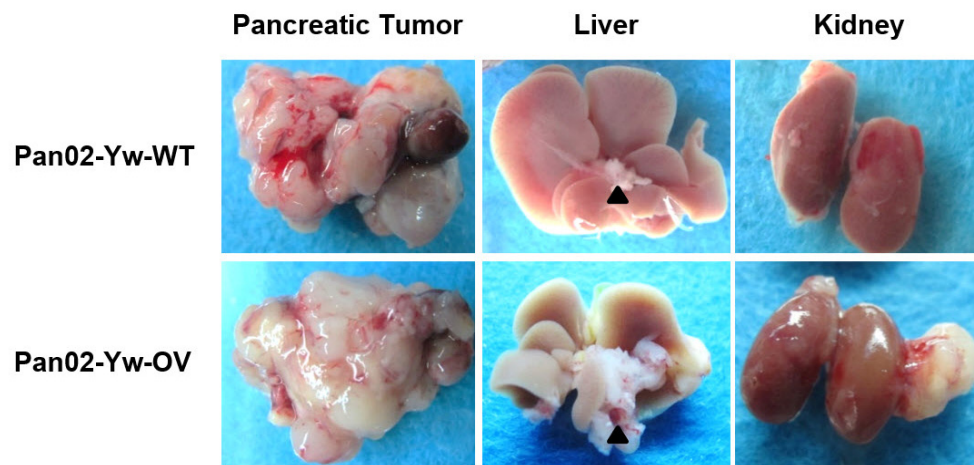



**Figure S7**

**A**

**AsPC-1 YW-WT**

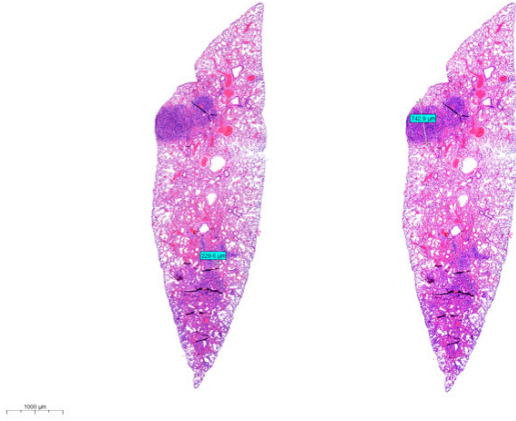

**B**

**AsPC-1 YW-OV**

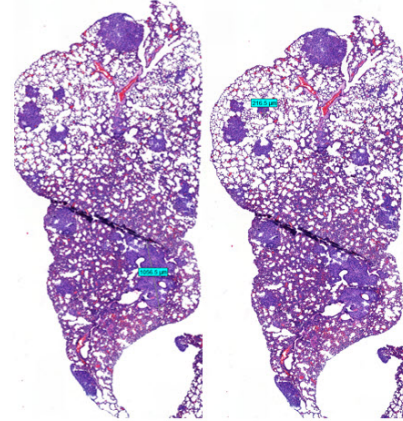

**C**

**AsPC-1 YW-WT**

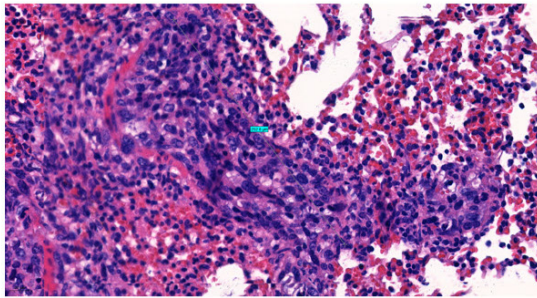

**D**

**AsPC-1 YW-OV**

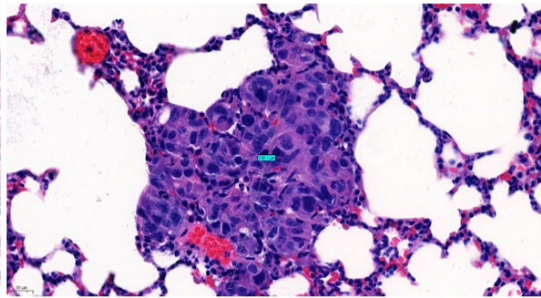

**Figure S8**

**A**

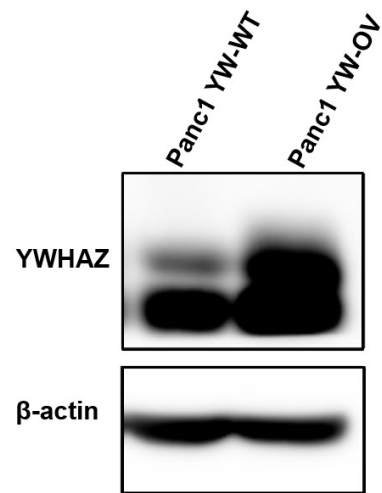

**B**

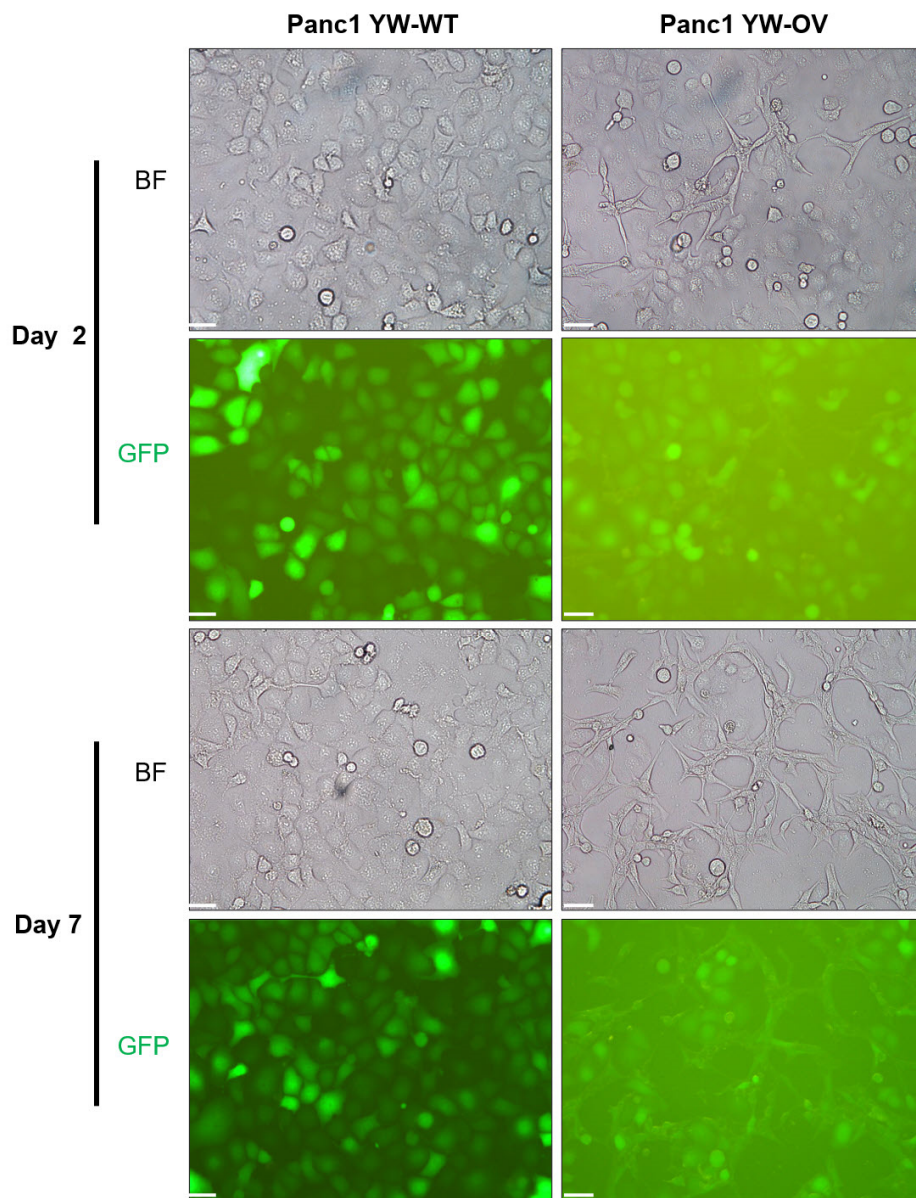

Figure S9

A

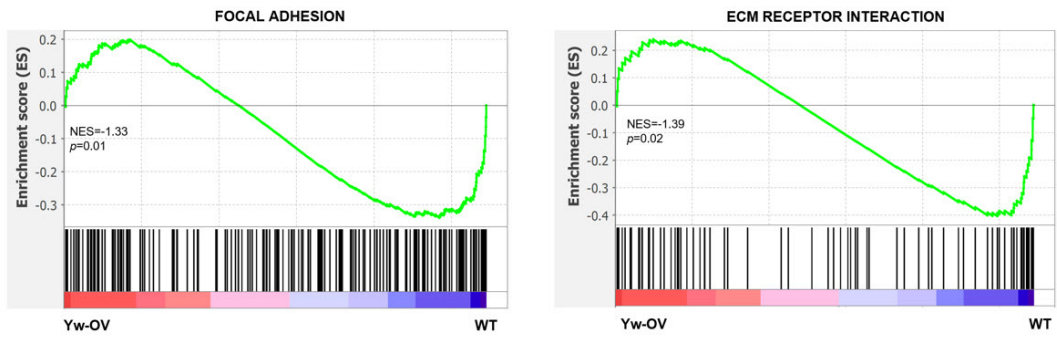

B

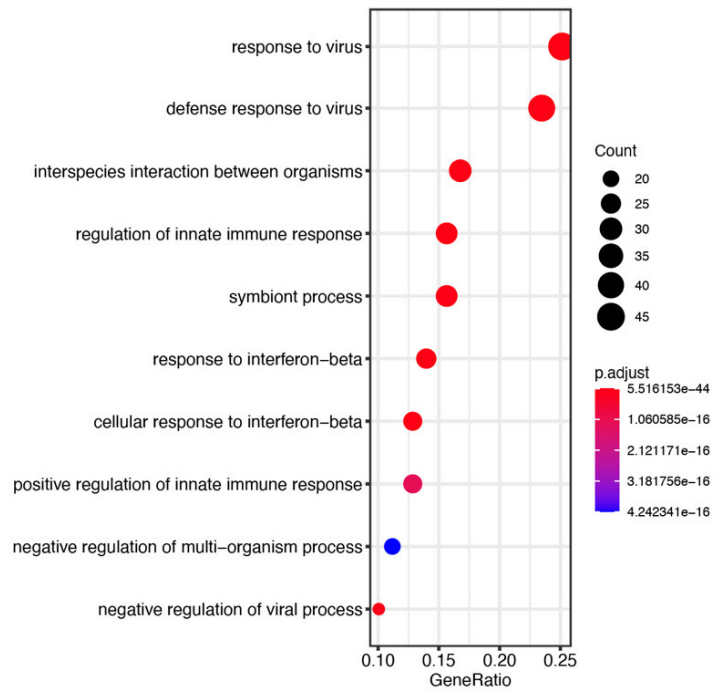

**Figure S10**

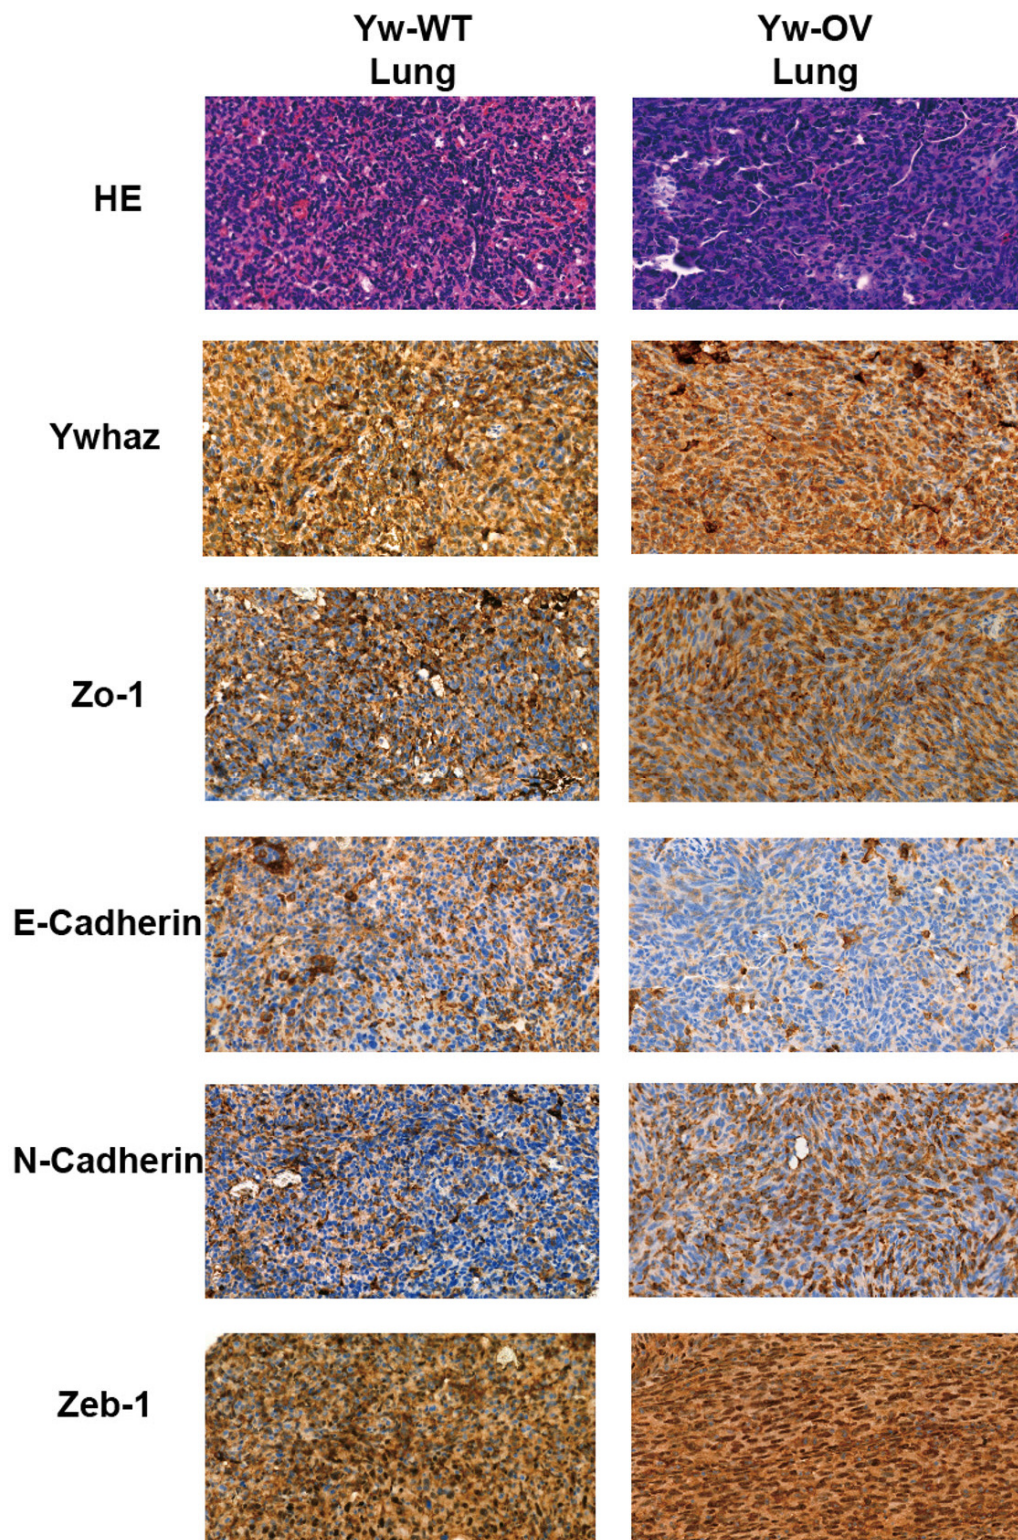

**Supplementary Table S1. Primers used in this study**

| Name           | Sequences                                                          | Application      |
|----------------|--------------------------------------------------------------------|------------------|
| ANXA3-3        | AGCCACCAAAACTACTTAAACCTCCAG                                        | Splinkerette PCR |
| ANXA3-5        | TAAACTAACCACATGCTGGCAACCTC                                         | Splinkerette PCR |
| ERRFI1-3       | TGAAACTGAGTCTTTATTGCCACTTCTCC                                      | Splinkerette PCR |
| ERRFI1-5       | TCACCCACTCCTCCTTCTATCGTCA                                          | Splinkerette PCR |
| YWHAZ-3        | CTGTTCTGGACACTGCTCATTTGGCTAC                                       | Splinkerette PCR |
| YWHAZ-5        | TACTTGAGACGACCCTCCACGATGAC                                         | Splinkerette PCR |
| ANXA2-3        | GGATGTCTTTGAACCTCTGATCCTCCTG                                       | Splinkerette PCR |
| ANXA2-5        | GCATCGCAGAACTATGTCCAACCTCA                                         | Splinkerette PCR |
| VMP1-3         | GCACGTTGGCTTGACCTGGCTTACAC                                         | Splinkerette PCR |
| VMP1-5         | ACAGTTCAGTGTGGTTGCAGGTGT                                           | Splinkerette PCR |
| HMSpAa         | CGAAGAGTAACCGTTGCTAGGAGAGACCGTGGCTGAATGAGACT<br>GGTGTGCGACACTAGTGG | Splinkerette PCR |
| HMSpBb-Sau3A1  | GATCCCACTAGTGTGACACCAGTCTCTAATTTTTTTTTTCAAAAAA                     | Splinkerette PCR |
| HMSp1          | CGAAGAGTAACCGTTGCTAGGAGAGACC                                       | Splinkerette PCR |
| HMSp2          | GTGGCTGAATGAGACTGGTGTGCGAC                                         | Splinkerette PCR |
| PB3'-1st round | TAAATAAACCTCGATATACAGACCGATAAA                                     | Splinkerette PCR |
| PB3'-2nd round | ATATACAGACCGATAAAACACATGCGTCAA                                     | Splinkerette PCR |
| PB3'-seq       | TTTACGCATGATTATCTTTAACGTACGTC                                      | Splinkerette PCR |
| PB5'-1st round | CAAAATCAGTGACACTTACCGCATTGACAA                                     | Splinkerette PCR |
| PB5'-2nd round | CTTACCGCATTGACAAGCACGCCTCACGGG                                     | Splinkerette PCR |
| PB5'-seq       | TTAGAAAGAGAGAGCAATATTTCAAGAATG                                     | Splinkerette PCR |
| E-cadherin-S   | AGGTTTTCGGGCACCACCTTA                                              | qPCR             |
| E-cadherin-AS  | TGATGTTGCTGTCCCAAGT                                                | qPCR             |
| CK19-S         | TCCCAGCTCAGCATGAAAGCT                                              | qPCR             |
| CK19-AS        | AAAACCGCTGATCACGCTCTG                                              | qPCR             |
| Zeb1-S         | CCACTGTGGAGGACCAGAAT                                               | qPCR             |
| Zeb1-AS        | CTCGTGAGGCCTCTTACCTG                                               | qPCR             |
| Fsp1-S         | TTGTGTCCACCTTCCACA                                                 | qPCR             |
| Fsp1-AS        | GCTGTCCAAGTTGCTCAT                                                 | qPCR             |
| N-cadherin-S   | CATCAACCGGCTTAATGGTG                                               | qPCR             |
| N-cadherin-AS  | ACTTTCACACGCAGGATGGA                                               | qPCR             |
| YWHAZ-S        | GAAAAGTTCTTGATCCCAATGC                                             | qPCR             |
| YWHAZ-AS       | TGTGACTGGTCCACAATTCCTT                                             | qPCR             |
| GAPDH-S        | ATGTTCCAGTATGACTCCAACCTCACG                                        | qPCR             |
| GAPDH-AS       | GAAGACACCAGTAGACTCCACGACA                                          | qPCR             |

**Supplementary Table S2. The mouse models in the screening were summarized**

| Libraries | Mutant Clones | Injection methods   | Mouse number per methods |
|-----------|---------------|---------------------|--------------------------|
| L1        | 64,220        | i.p.,i.v.,s.c.,o.r. | 6                        |
| L2        | 39,666        | i.p.,i.v.,s.c. o.r. | 4                        |
| L3        | 64,357        | i.p.,i.v.,s.c.,o.r. | 6                        |
| L4        | 85,367        | i.p.,i.v.,s.c.,o.r. | 8*                       |
| L5        | 69,744        | i.p.,i.v.,s.c.,o.r. | 6                        |
| L6        | 94,743        | i.p.,i.v.,s.c.,o.r. | 9*                       |
| L7        | 43,690        | i.p.,i.v.,s.c.,o.r. | 4                        |

“\*” means two mice were missing in the orthotopic mouse models. The amount of cells injected was  $2.5 \times 10^6$ /mice for i.p.,  $1 \times 10^6$ /mice for i.v.,  $2.5 \times 10^6$ /mice for s.c. (both dorsal flanks), and  $1 \times 10^6$ /mice for o.r., respectively.

**Supplementary Table S3. Metastatic subpopulation cultured from mice burdened with libraries**

|       | Lung | Liver | Stomach | Adrenal | Brain | Metastasis in Cavity | Kidney | Gall Bladder | Total |
|-------|------|-------|---------|---------|-------|----------------------|--------|--------------|-------|
| i.p.  | 18   | 15    | 3       | 5       | 2     | 1                    | 0      | 0            | 44    |
| i.v.  | 19   | 1     | 0       | 0       | 2     | 9                    | 0      | 0            | 31    |
| o.r.  | 25   | 19    | 2       | 5       | 1     | 0                    | 1      | 1            | 54    |
| s.c.  | 20   | 2     | 0       | 1       | 4     | 3                    | 0      | 0            | 30    |
| Total |      |       |         |         |       |                      |        |              | 159   |

**Supplementary Table S4. Highly metastatic tumor cells were dissected and cultured from both +/- Dox treatment groups**

|               | i.p. |    | o.r. |    | i.v. |    | s.c. |    | Total |
|---------------|------|----|------|----|------|----|------|----|-------|
| Dox treatment | -    | +  | -    | +  | -    | +  | -    | +  |       |
| Lung          | 5    | 6  | 5    | 6  | 16   | 9  | 9    | 9  | 65    |
| Liver         | 4    | 3  | 3    | 4  | 0    | 1  | 1    | 0  | 16    |
| Adrenal       | 2    | 2  | 1    | 2  | 0    | 0  | 0    | 0  | 7     |
| Brain         | 1    | 1  | 1    | 2  | 1    | 1  | 2    | 0  | 9     |
| Others*       | 0    | 0  | 0    | 0  | 4    | 2  | 3    | 1  | 10    |
| Total         | 12   | 12 | 10   | 14 | 21   | 13 | 15   | 10 | 107   |

\* means metastatic tumor in cavity and bone

**Supplementary Table S5. Integration site analysis of the gene search vectors**

| PB-GSV(3TR) integration sites | Gene                 | Mutagenesis                                                            | PB-GSV Location in Gene | Organ Metastasis                    | Frequency | "-DOX(n,%)" | Mouse Model |
|-------------------------------|----------------------|------------------------------------------------------------------------|-------------------------|-------------------------------------|-----------|-------------|-------------|
| chr4: 150,857,587             | <i>Erff1</i>         | knock down                                                             | 1st intron              | lung, kidney, brain,bone, skin      | 26        | 19 (73.1%)  | i.v.        |
| chr11: 86,589,741             | <i>Vmp1</i>          | knock down                                                             | 1st intron              | lung, kidney, brain,bone, skin      | 26        | 19 (73.1%)  | i.v.        |
| chr4:150,857,587              | <i>1700045H11Rik</i> | overexpress                                                            | downstream 1kb          | lung, kidney, brain,bone, skin      | 26        | 19 (73.1%)  | i.v.        |
| chr9: 69,467,531              | <i>Anxa2</i>         | knock down                                                             | 3rd intron              | liver, kidney, adrenal, lung, brain | 21        | 7 (33.3%)   | o.r.        |
| chr15: 36,791,535             | <i>Ywhaz</i>         | overexpress                                                            | 2nd intron              | lung, liver, kidney, brain, bone    | 20        | 15 (75%)    | s.c.        |
| chr5: 96,801,682              | <i>Anxa3</i>         | knock down                                                             | 2nd intron              | lung, liver                         | 8         | 5 (62.5%)   | i.p.        |
| chr8: 123,433,321             | <i>Def8</i>          | overexpress                                                            | upstream 20kb           | liver, lung, kidney                 | 6         | 2(33.3%)    | o.r.        |
| chr9:16,296,965               | <i>Fat3</i>          | knock down                                                             | the last intron         | lung                                | 2         | 1(50%)      | i.p./i.v.   |
| chr16: 23,521,031             | <i>Masp1</i>         | overexpress                                                            | the promoter            | peritoneal metastasis               | 1         | 1(100%)     | s.c.        |
| chr4: 45,912,953              | <i>E230008N13Rik</i> | knock down                                                             | 12th intron             | lung                                | 1         | 1(100%)     | s.c.        |
| chr2: 18,083,206              | <i>Milt10</i>        | knock down                                                             | 18th intron             | lung                                | 1         | 1(100%)     | s.c.        |
| chr9:123,431,934              | <i>Lars2</i>         | overexpress                                                            | 10th intron             | lung                                | 1         | 1(100%)     | i.v.        |
| chr10: 13,746,456             | <i>Aig1</i>          | knock down                                                             | 2nd intron              | lung                                | 1         | 1(100%)     | i.v.        |
| chr5: 142,906,409             | <i>Actb</i>          | overexpress                                                            | the last intron         | lung                                | 1         | 1(100%)     | i.v.        |
| chr3: 135,212,206             | <i>Cenpe</i>         | overexpress                                                            | in promoter             | kidney                              | 1         | 1(100%)     | i.v.        |
| chr15: 84,146,745             | <i>Parvb</i>         | knock down                                                             | downstream 1kb          | lung                                | 1         | 1(100%)     | i.p.        |
| chr6: 94,646,619              | <i>Lrig1</i>         | knock down                                                             | 3rd intron              | lung                                | 1         | 1(100%)     | i.p.        |
| chr6: 94,646,619              | <i>Slc25a26</i>      | knock down                                                             | downstream 30kb         | lung                                | 1         | 1(100%)     | i.p.        |
| chr11: 78,264,792             | <i>2610507B11Rik</i> | overexpress                                                            | 5th intron              | kidney                              | 1         | 1(100%)     | o.r.        |
| chr15: 103,830,902            | <i>Muc11</i>         | knock down                                                             | 2nd intron              | lung                                | 1         | 1(100%)     | o.r.        |
| chr14: 63,537,545             | <i>Mtmr9</i>         | overexpress                                                            | the 5th intron          | peritoneal metastasis               | 1         | 0(0)        | i.v.        |
| chr5: 110,058,064             | <i>Gtpbp6</i>        | knock down                                                             | upstream 30bp           | peritoneal metastasis               | 1         | 0(0)        | i.v.        |
| chr5: 110,058,064             | <i>Plcx1</i>         | overexpress                                                            | upstream 30kb           | peritoneal metastasis               | 1         | 0(0)        | i.v.        |
| chr4:83,450,782               | <i>Snapp3</i>        | knock down                                                             | 7th intron              | peritoneal metastasis               | 1         | 0(0)        | i.v.        |
| chrX: 71,215,884              | <i>Mtm1</i>          | overexpress                                                            | 2nd intron              | lung                                | 1         | 0(0)        | i.v.        |
| chr6: 70,782,214              | <i>Rpia</i>          | knock down                                                             | 6th intron              | peritoneal metastasis               | 1         | 0(0)        | i.v.        |
| chr3: 101,169,815             | <i>Ptgfrn</i>        | knock down                                                             | downstream 30kb         | lung                                | 1         | 0(0)        | i.v.        |
| chr16: 44,452,992             | <i>Wdr52</i>         | overexpress                                                            | 17th intron             | lung                                | 1         | 0(0)        | i.v.        |
| chr8: 47,796,856              | <i>Cdkn2aip</i>      | knock down                                                             | downstream 30kb         | lung                                | 1         | 0(0)        | i.v.        |
| chr9: 118,359,311             | <i>Eomes</i>         | overexpress                                                            | upstream 30kb           | lung                                | 1         | 0(0)        | i.v.        |
| chr9: 118,359,311             | <i>4933432G23Rik</i> | overexpress                                                            | upstream 30kb           | lung                                | 1         | 0(0)        | i.v.        |
| chr1: 156,605,921             | <i>Abl2</i>          | overexpress                                                            | 2nd intron              | lung                                | 1         | 0(0)        | i.v.        |
| chr1: 150,099,386             | <i>Ptgs2os</i>       | overexpress                                                            | in promoter             | lung                                | 1         | 0(0)        | i.v.        |
| chr6: 83,465,612              | <i>Dguok</i>         | overexpress                                                            | the 5th intron          | peritoneal metastasis               | 1         | 0(0)        | i.v.        |
| chr3: 87,150,664              | <i>Kirrel</i>        | overexpress                                                            | the last intron         | lung                                | 1         | 0(0)        | s.c.        |
| chr4: 149,779,407             | <i>Slc25a33</i>      | knock down                                                             | downstream 5kb          | lung                                | 1         | 0(0)        | s.c.        |
| chr16: 11,202,249             | <i>2610020C07Rik</i> | overexpress                                                            | upstream 500bp          | kidney                              | 1         | 0(0)        | o.r.        |
| chr16: 11,202,249             | <i>Rsl1d1</i>        | knock down                                                             | 8th intron              | kidney                              | 1         | 0(0)        | o.r.        |
| chr8: 64,947,008              | <i>Tmem192</i>       | overexpress                                                            | in promoter             | liver                               | 1         | 0(0)        | o.r.        |
| chr1: 26,559,603              | <i>4931408C20Rik</i> | knock down                                                             | downstream 30kb         | liver                               | 1         | 0(0)        | o.r.        |
| chr2: 50,444,298              | positive strand      | None known genes or RNA sequence identified in these genome areas(NGR) |                         | lung                                | 1         | 1(100%)     | i.p.        |
| chr6: 76,628,998              | negative strand      |                                                                        |                         | lung                                | 1         | 0(0)        | o.r.        |
| Chr14: 45,801,718             | negative strand      |                                                                        |                         | brain                               | 1         | 0(0)        | o.r.        |
| chr7: 62,611,638              | positive strand      |                                                                        |                         | brain                               | 1         | 0(0)        | o.r.        |
| chr2: 57,742,460              | positive strand      |                                                                        |                         | kidney                              | 1         | 0(0)        | i.v.        |
| chrUn_random:4,604,836        | positive strand      |                                                                        |                         | liver                               | 1         | 0(0)        | s.c.        |

**Supplementary Table S6. Candidate genes involved in 12 main functional pathways**

| <b>Signaling pathways involved by identified genes</b>         | <b>Mainly from -Dox group</b>                 | <b>Mainly from +Dox group</b>                                                                                                |
|----------------------------------------------------------------|-----------------------------------------------|------------------------------------------------------------------------------------------------------------------------------|
| Cell-cell adhesion /integrin signaling                         | <i>Ywhaz, Vmp1actb<br/>Parvb, Fat3</i>        | <i>Anxa2,<br/>Fat3</i>                                                                                                       |
| Cell mobility/invasion regulation                              | <i>Actb,<br/>Parvb</i>                        | <i>Anxa2,<br/>Abl2</i>                                                                                                       |
| Wnt/TGF- $\beta$ pathway signaling                             | <i>Ywhaz, Mllt10</i>                          |                                                                                                                              |
| Receptor/ protein tyrosine kinase (RTK) signaling              | <i>Errfi1, Lrig1,<br/>Mucl1</i>               | <i>Abl2</i>                                                                                                                  |
| Cell cycle control                                             | <i>Ywhaz, Cenpe</i>                           | <i>Cdkn2aip</i>                                                                                                              |
| Apoptosis/autophagy signaling                                  | <i>Ywhaz, Anxa3,<br/>Aig1, Lrig1<br/>Vmpl</i> | <i>Tmem192 Abl2<br/>Cdkn2aip</i>                                                                                             |
| Immune response regulation                                     | <i>Anxa3, Masp1,<br/>Mucl1</i>                |                                                                                                                              |
| Early embryogenesis and development                            | <i>Fat3</i>                                   | <i>Kirrel, Abl2<br/>Fat3, Eomes</i>                                                                                          |
| Stem cell maintenance pathway signaling                        | <i>Lrig1</i>                                  | <i>Eomes</i>                                                                                                                 |
| Metabolic/mitochondrial related pathways                       | <i>Slc25a26,<br/>Dguok, Lars2</i>             | <i>Slc25a33,<br/>Rpia</i>                                                                                                    |
| PTEN/phosphoinositide 3-kinase signaling                       | <i>Errfi1</i>                                 | <i>Mtm1 and Mtmr9</i>                                                                                                        |
| Gene expression and protein synthesis                          |                                               | <i>Snapc3</i>                                                                                                                |
| Genes/non-coding RNAs of unknown function in cancer metastasis | <i>2610507B11Rik</i>                          | <i>Mgtbp6, Plcxdl<br/>2610020C07Rik,<br/>4931408C20Rik, Def-8,<br/>Ptgs2os, Wdr52,<br/>4933432G23Rik, Ptgfrn,<br/>Rsl1d1</i> |



**Supplementary Table S7. Multivariate COX regression analysis of the candidate genes in patients**

N=173, Pancreatic Adenocarcinoma, Compared with Overall Survival Time

| <b>Candidate genes</b> | <b>HR (95% CI)</b> | <b>P value</b> |
|------------------------|--------------------|----------------|
| <i>ERRF1</i>           | 1.51 (0.99 – 2.3)  | 0.054          |
| <i>VMP1</i>            | 0.67 (0.43-1.06)   | 0.084          |
| <i>ANXA2</i>           | 2.5 (1.65 – 3.79)  | 8.4e-06        |
| <i>YWHAZ</i>           | 2.65 (1.68 – 4.16) | 1.2e-05        |
| <i>ANXA3</i>           | 2.57 (1.54 – 4.28) | 0.00017        |
| <i>FAT3</i>            | 0.79 (0.52 – 1.21) | 0.28           |
| <i>MASPI</i>           | 0.82 (0.53 – 1.26) | 0.36           |
| <i>MLLT10</i>          | 0.65 (0.43 – 1.01) | 0.051          |
| <i>LARS2</i>           | 0.87 (0.56 – 1.36) | 0.53           |
| <i>AIG1</i>            | 0.78 (0.49 – 1.22) | 0.28           |
| <i>ACTB</i>            | 1.59 (0.97 – 2.59) | 0.063          |
| <i>CENPE</i>           | 2.29 (1.49 – 3.54) | 0.00011        |
| <i>PARVB</i>           | 0.58 (0.39 – 0.89) | 0.01           |
| <i>LRIG1</i>           | 0.79 (0.52 – 1.18) | 0.25           |
| <i>SLC25A26</i>        | 0.7 (0.44 – 1.1)   | 0.12           |
| <i>MUCL1</i>           | 0.54 (0.32 – 0.89) | 0.014          |

\*Variables including expression level of the candidate genes, patients' age, gender and TMN stage. Data were extracted from TCGA and HPA databases.

**Supplementary Table S8. The genetic alterations of candidate genes in patients**

| Positive cases/Tested cases, Percent (%) |                       |                              |                                |
|------------------------------------------|-----------------------|------------------------------|--------------------------------|
| <b>Candidate Genes</b>                   | <b>Point Mutation</b> | <b>Copy Number Variation</b> | <b>Gene expression</b>         |
| <i>YWHAZ</i>                             | 26/1258, 2.07%        | AMP, 6.5%                    | Overexpressed<br>9/168, 13.69% |
| <i>ANXA3</i>                             | 19/1258, 1.51%        | HOMDEL,2.8%<br>AMP,0.7%      | Overexpressed<br>5/168, 2.98%  |
| <i>ANXA2</i>                             | 24/1258, 1.91%        | HOMDEL,0.9%<br>AMP,0.7%      | -                              |
| <i>CENPE</i>                             | 41/1258, 3.26%        | HOMDEL,6.4%                  | Overexpressed<br>7/168, 4.17%  |
| <i>PARVB</i>                             | 108/1258, 8.59%       | AMP,2.0%<br>HOMDEL,1.1%      | Overexpressed,<br>4/168, 2.38% |
| <i>MUCL1</i>                             | 15/1258, 1.19%        | AMP,0.7%<br>HOMDEL,1.8%      | -                              |

Note “-” represents no data available. AMP: amplification; HOMDEL: Homologous deletion. Data were extracted from the COSMIC database (<https://cancer.sanger.ac.uk/cosmic>) and cBioPortal for cancer genomics ([www.cbioportal.org](http://www.cbioportal.org)).
