# Supplementary material for: High-throughput functional screen identifies YWHAZ as a key regulator of pancreatic cancer metastasis
Source: PubMed Central journal article supplement (PMC10349114; doi:10.1038/s41419-023-05951-5), 2023-07-14

## Western blot raw data

Fig 6C

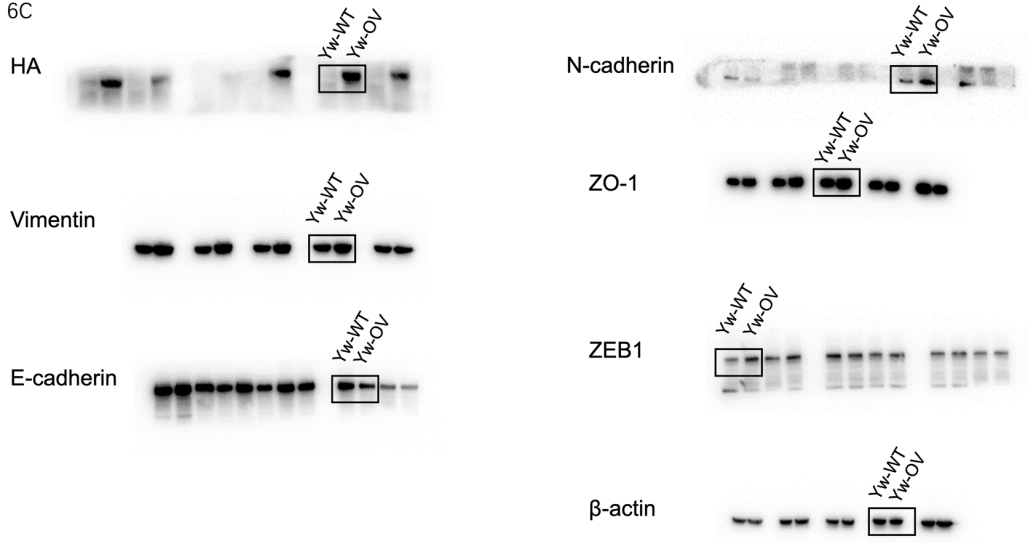

Fig 3E

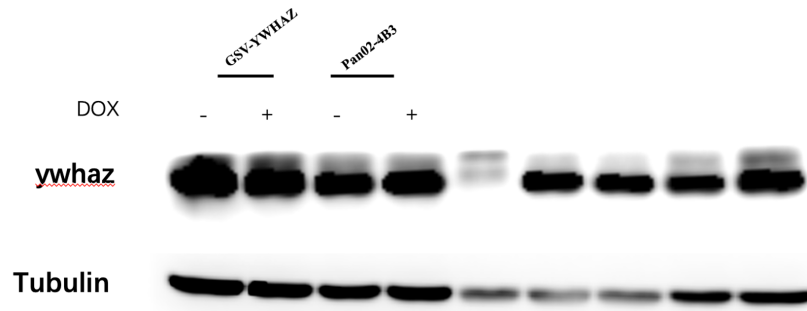

Fig 5I

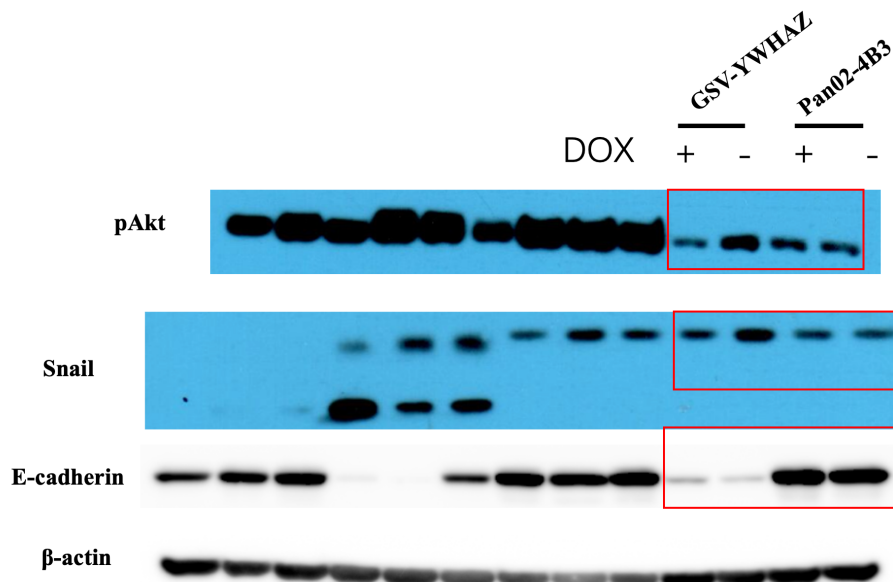

Supplement: 41419_2023_5951_MOESM2_ESM.pdf [file 41419_2023_5951_MOESM2_ESM.pdf]
