# Supplementary material for: High-throughput functional screen identifies YWHAZ as a key regulator of pancreatic cancer metastasis
Source: PubMed Central journal article supplement (PMC10349114; doi:10.1038/s41419-023-05951-5), 2023-07-14
Supplement: 41419_2023_5951_MOESM3_ESM.pdf [file 41419_2023_5951_MOESM3_ESM.pdf]

**YWHAZ story: Accepted in Principle**

发送会议  
2023-07-05 08:44:48

发件人: "kailongli" <kailongli@pku.edu.cn>

收件人: caofang820@163.com yunpengjiang@stu.pku.edu.cn changlin0730@126.com duhongzhen@ioz.ac.cn changde5501@foxmail.com chunxiaopan@outlook.com hxz182182@163.com yudonglin@stu.pku.edu.cn 497733742@qq.com ynfan2013@163.com bianxiaocui@ibms.cams.cn [隐藏信息]

▶ 发送成功 [查看详情] 共发给11个收件人, 其中 11个成功到达对方服务器

Hi all,

Our manuscript entitled "High-throughput functional screen identifies YWHAZ as a key regulator of pancreatic cancer metastasis" has been provisionally accepted for publication in *Cell Death & Disease*. Our most recent author list differs from the one in the original submission because of the revision. To move forward, please reply "Agree" to my email confirming that you agree to these changes. Thanks.

The current list is:

Fang Cao<sup>1,6</sup>, Yunpeng Jiang<sup>5,6</sup>, Lin Chang<sup>2,3</sup>, Hongzhen Du<sup>3</sup>, De Chang<sup>4</sup>, Chunxiao Pan<sup>3</sup>, Xiaozheng Huang<sup>1</sup>, Donglin Yu<sup>5</sup>, Mi Zhang<sup>4</sup>, Yongna Fan<sup>3</sup>, Xiaocui Bian<sup>3\*</sup>, Kailong Li<sup>5\*</sup>

Best,  
Kailong

1.

**Re: YWHAZ story: Accepted in Principle**

发件人: "曹放" <caofang820@163.com>

收件人: "kailongli" <kailongli@pku.edu.cn>

Agree

--- Replied Message ---

2.

**Re: YWHAZ story: Accepted in Principle**

发件人: "蒋云鹏" <yunpengjiang@stu.pku.edu.cn>

收件人: "kailongli" <kailongli@pku.edu.cn>

Agree

3.

**Re: YWHAZ story: Accepted in Principle**

发件人: "linchang" <changlin0730@126.com>

收件人: "kailongli" <kailongli@pku.edu.cn>

抄 送: caofang820@163.com yunpengjiang@stu.pku.edu.cn

Agree

4.

**Re: YWHAZ story: Accepted in Principle**

发件人: "杜洪震" <duhongzhen@ioz.ac.cn>

收件人: "kailongli" <kailongli@pku.edu.cn>

Agree

5.

**Re: YWHAZ story: Accepted in Principle**

发件人: "Chandler" <changde5501@foxmail.com>

收件人: "kailongli" <kailongli@pku.edu.cn>

Agree.

6.

**Re: YWHAZ story: Accepted in Principle**

发件人: "chunxiaopan@outlook.com" <chunxiaopan@outlook.com>  
收件人: "kailongli" <kailongli@pku.edu.cn> "caofang820" <caofang820@163.com>  
... [还有6个联系人]

Agree.

7.

**Re: YWHAZ story: Accepted in Principle**

发件人: "hxz182182" <hxz182182@163.com>  
收件人: "kailongli" <kailongli@pku.edu.cn>

agree

8.

**Re: YWHAZ story: Accepted in Principle**

发件人: "余东林" <yudonglin@stu.pku.edu.cn>  
收件人: "kailongli" <kailongli@pku.edu.cn>  
抄 送: caofang820@163.com yunpengjiang@stu.pku.edu.cn

Agree

9.

**Re: YWHAZ story: Accepted in Principle**

发件人: "Mi Zhang" <497733742@qq.com>  
收件人: "kailongli" <kailongli@pku.edu.cn>

Agree

10.

**Re: YWHAZ story: Accepted in Principle**

发件人: "范永娜" <yfnan2013@163.com>  
收件人: "kailongli" <kailongli@pku.edu.cn>

Agree

11.

**Re: YWHAZ story: Accepted in Principle**

发件人: "卞晓翠" <bianxiaocui@ibms.cams.cn>  
收件人: "kailongli" <kailongli@pku.edu.cn>

Agree
